# Supplementary material for: The Znt7-null mutation has sex dependent effects on the gut microbiota and goblet cell population in the mouse colon
Source: PLOS journal article supplement (doi:10.1371/journal.pone.0239681), 2020-09-29
Supplement: S3 (10.1371/journal.pone.0239681.s003) [file journal.pone.0239681.s003]

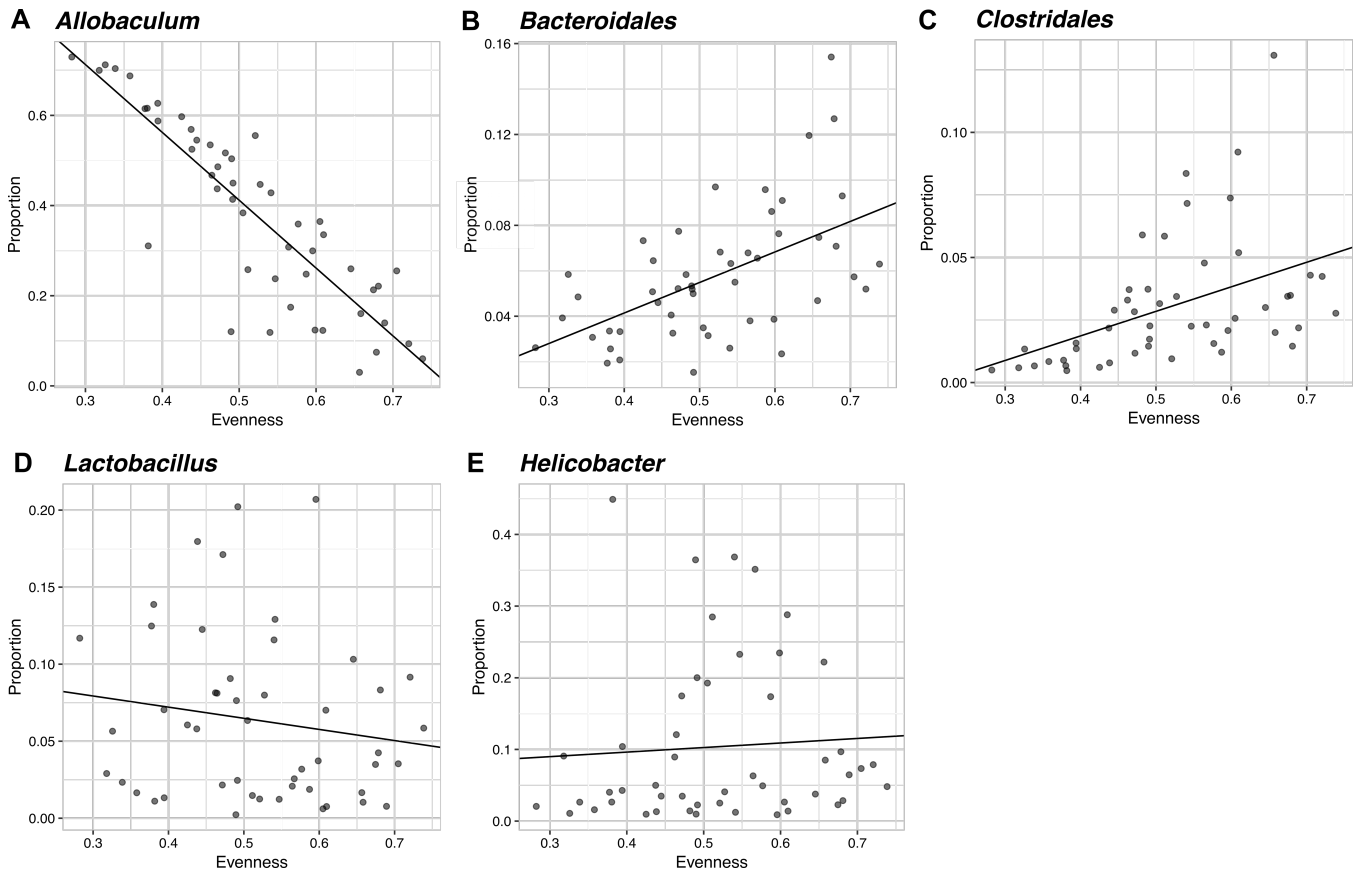

**S3 Fig. Relationship between evenness and the relative proportion of abundant bacterial taxa within the mouse colon.** The alpha diversity measurement of bacterial community evenness is shown (x-axes) relative to the proportions of (A) *Allobaculum*,  $\rho = -0.8667347$ ,  $p < 2.2 \times 10^{-16}$ , (B) *Bacteroidales*,  $\rho = 0.5289796$ ,  $p < 0.001$ , (C) *Clostridiales*,  $\rho = 0.5872449$ ,  $p < 0.0001$ , (D) *Lactobacillus*,  $\rho = -0.1709184$ ,  $p = 0.2395$  and (E) *Helicobacter*,  $\rho = 0.1867347$ ,  $p = 0.1983$  are shown on the y-axis. A regression line showing the linear relationship between evenness and proportion of each bacterial taxa (Spearman) is shown on each graph.
